# Supplementary material for: Enhancement of the rate performance of plasma-treated platelet carbon nanofiber anodes in lithium-ion batteries
Source: Royal Society of Chemistry journal article supplement (doi:10.1039/c5ra20650b), 2016-01-01
Supplement: c5ra20650b1.pdf [file c5ra20650b1.pdf]

*Electronic Supplementary Information (ESI) for*

## **Enhancement of the rate performance of plasma-treated platelet carbon nanofiber anode in lithium-ion battery**

Yu-Jin Han,<sup>a</sup> Choonghyeon Lee,<sup>b</sup> Young Deok Seo,<sup>b</sup> Koji Nakabayashi,<sup>c</sup> Jin Miyawaki,<sup>c</sup>

Ricardo Santamaría,<sup>d</sup> Rosa Menéndez,<sup>d</sup> Jyongsik Jang<sup>\*,b</sup> and Seong-Ho Yoon<sup>\*,a,c</sup>

a) Interdisciplinary Graduated School of Engineering Sciences, Kyushu University, Fukuoka, Japan. E-mail: yoon@cm.kyushu-u.ac.jp, Tel.: +81-92-583-7959, Fax: +81-92-583-7879

b) School of Chemical and Biological Engineering, College of Engineering, Seoul National University, Seoul, Korea. E-mail: jsjang@plaza.snu.ac.kr, Tel.: +82-2-880-7069, Fax: +82-2-888-1604

c) Institute for Materials Chemistry and Engineering, Kyushu University, Fukuoka, Japan

d) Department of Chemistry of Materials, Instituto Nacional del Carbón, INCAR-CSIC, Oviedo, Spain

## Supporting Figures

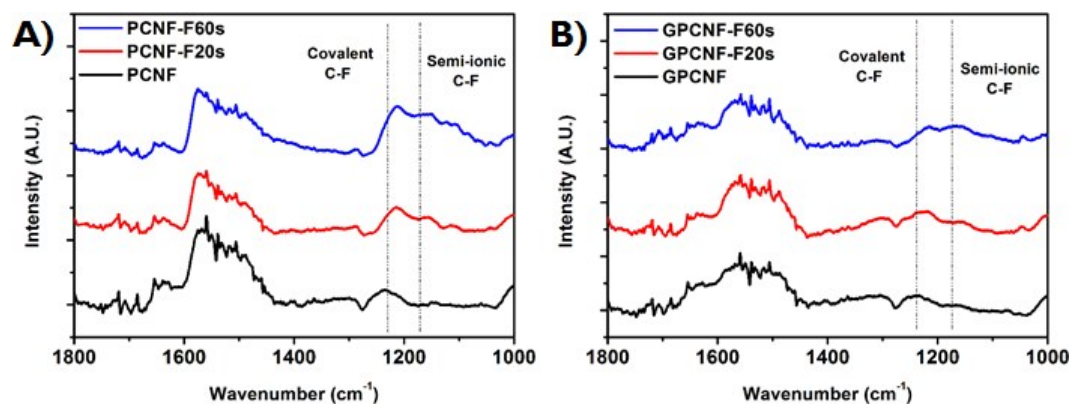

**Fig. S1** FT-IR spectra of a) PCNF, PCNF-F20s, PCNF-F60s and b) GPCNF, GPCNF-F20s, GPCNF-F60s.

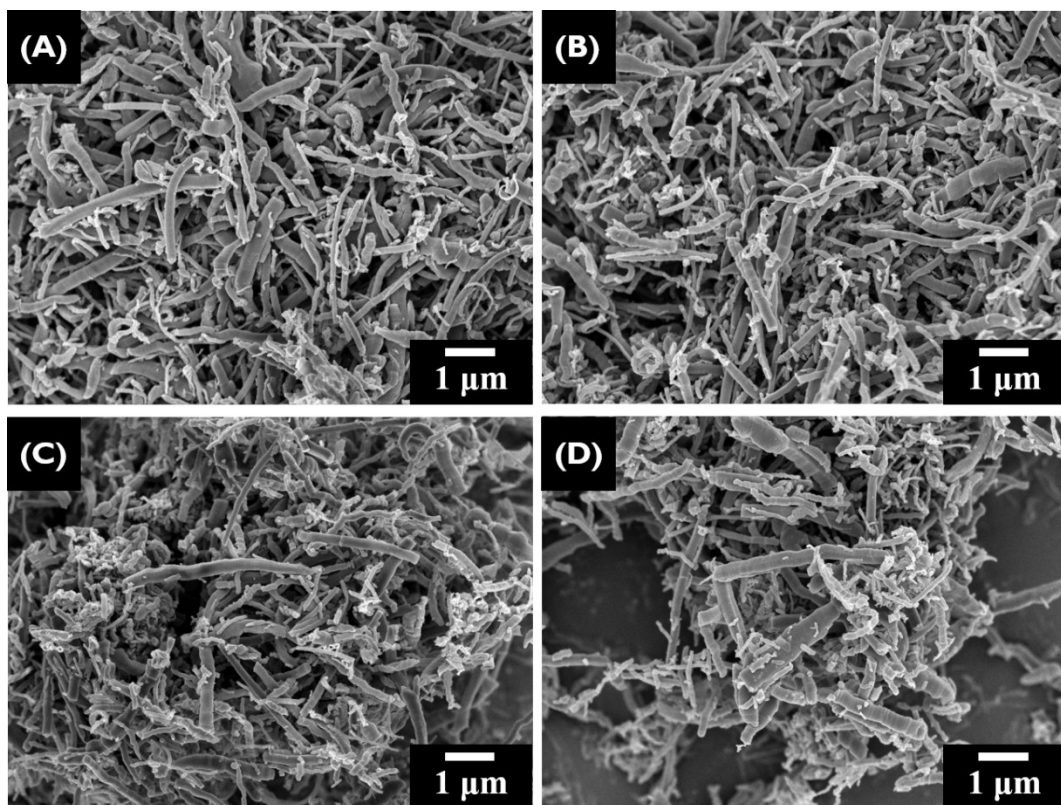

**Fig. S2** SEM images of a) PCNF; b) PCNF-F60s; c) GPCNF and d) GPCNF-F60s. All images were taken at X10000 magnification.

**Table S1** Elemental compositions of the C<sub>m</sub>F<sub>n</sub>- modified PCNFs/GPCNFs.

| <b>Samples</b>    | <b>Elemental analysis (%)</b> |                          |                                | <b>XPS (%)</b> |          |          |
|-------------------|-------------------------------|--------------------------|--------------------------------|----------------|----------|----------|
|                   | <b>C</b>                      | <b>O<sub>diff.</sub></b> | <b>&amp; F<sub>diff.</sub></b> | <b>C</b>       | <b>O</b> | <b>F</b> |
| <b>PCNF</b>       | 99.5                          |                          | 0.5                            | 91.5           | 8.5      | -        |
| <b>PCNF-F5s</b>   | 98.7                          |                          | 1.3                            | 89.0           | 7.6      | 3.4      |
| <b>PCNF-F20s</b>  | 98.2                          |                          | 1.8                            | 89.9           | 6.0      | 4.1      |
| <b>PCNF-F60s</b>  | 98.0                          |                          | 2.0                            | 90.7           | 3.7      | 5.6      |
| <b>GPCNF</b>      | 99.9                          |                          | 0.1                            | 93.8           | 6.2      | -        |
| <b>GPCNF-F5s</b>  | 99.4                          |                          | 0.6                            | 90.9           | 7.5      | 1.6      |
| <b>GPCNF-F20s</b> | 98.5                          |                          | 1.5                            | 89.6           | 7.2      | 3.2      |
| <b>GPCNF-F60s</b> | 98.2                          |                          | 1.8                            | 89.4           | 6.8      | 3.8      |

**Table S2** XPS F1s analysis results of the C<sub>m</sub>F<sub>n</sub>-modified PCNFs/GPCNFs.

| <b>Samples</b>    | <b>Ionic<br/>(684.6 ± 0.5 eV)</b> | <b>Semi-ionic<br/>(687.1 ± 0.5 eV)</b> | <b>Covalent<br/>(690.0 ± 0.5 eV)</b> |
|-------------------|-----------------------------------|----------------------------------------|--------------------------------------|
| <b>PCNF-F5s</b>   | 27                                | 73                                     | -                                    |
| <b>PCNF-F20s</b>  | -                                 | 100                                    | -                                    |
| <b>PCNF-F60s</b>  | 4                                 | 87                                     | 9                                    |
| <b>GPCNF-F5s</b>  | 18                                | 82                                     | -                                    |
| <b>GPCNF-F20s</b> | 32                                | 68                                     | -                                    |
| <b>GPCNF-F60s</b> | 23                                | 59                                     | 18                                   |

**Table S3** TOF-SIMS analysis results of the C<sub>m</sub>F<sub>n</sub>-modified PCNFs/GPCNFs.

| <b>Sample</b>     | <b>Normalized peak intensity ratios</b>      |                                              |                                                            |                                                            |                                                            |
|-------------------|----------------------------------------------|----------------------------------------------|------------------------------------------------------------|------------------------------------------------------------|------------------------------------------------------------|
|                   | CF <sub>2</sub> <sup>+</sup> /C <sup>+</sup> | CF <sub>3</sub> <sup>+</sup> /C <sup>+</sup> | C <sub>2</sub> F <sub>3</sub> <sup>+</sup> /C <sup>+</sup> | C <sub>3</sub> F <sub>3</sub> <sup>+</sup> /C <sup>+</sup> | C <sub>3</sub> F <sub>5</sub> <sup>+</sup> /C <sup>+</sup> |
| <b>PCNF-F5s</b>   | 0.62                                         | 0.48                                         | 0.51                                                       | 0.31                                                       | 0.26                                                       |
| <b>PCNF-F20s</b>  | 0.73                                         | 0.73                                         | 0.59                                                       | 0.43                                                       | 0.38                                                       |
| <b>PCNF-F60s</b>  | 0.96                                         | 1.72                                         | 1.55                                                       | 0.83                                                       | 0.79                                                       |
| <b>GPCNF-F5s</b>  | 1.36                                         | 1.16                                         | 1.21                                                       | 0.64                                                       | 0.50                                                       |
| <b>GPCNF-F20s</b> | 1.23                                         | 1.41                                         | 1.30                                                       | 0.75                                                       | 0.55                                                       |
| <b>GPCNF-F60s</b> | 1.45                                         | 2.97                                         | 2.98                                                       | 1.14                                                       | 0.96                                                       |

**Table S4** XRD, Raman and BET analysis results of the C<sub>m</sub>F<sub>n</sub>-modified PCNFs/GPCNFs.

| <b>Samples</b>    | <b>Crystallographic parameters</b> |                        | <b>Raman spectra</b>                | <b>BET</b>                       |
|-------------------|------------------------------------|------------------------|-------------------------------------|----------------------------------|
|                   | d <sub>002</sub> (Å)               | Lc <sub>002</sub> (nm) | R (I <sub>D</sub> /I <sub>G</sub> ) | Surface area (m <sup>2</sup> /g) |
| <b>PCNF</b>       | 3.367                              | 56                     | 1.68                                | 97                               |
| <b>PCNF-F5s</b>   | 3.357                              | 61                     | 1.57                                | 95                               |
| <b>PCNF-F20s</b>  | 3.360                              | 62                     | 1.55                                | 93                               |
| <b>PCNF-F60s</b>  | 3.364                              | 68                     | 1.45                                | 90                               |
| <b>GPCNF</b>      | 3.368                              | 72                     | 0.25                                | 60                               |
| <b>GPCNF-F5s</b>  | 3.365                              | 73                     | 0.24                                | 59                               |
| <b>GPCNF-F20s</b> | 3.362                              | <100                   | 0.26                                | 58                               |
| <b>GPCNF-F60s</b> | 3.360                              | <100                   | 0.25                                | 56                               |

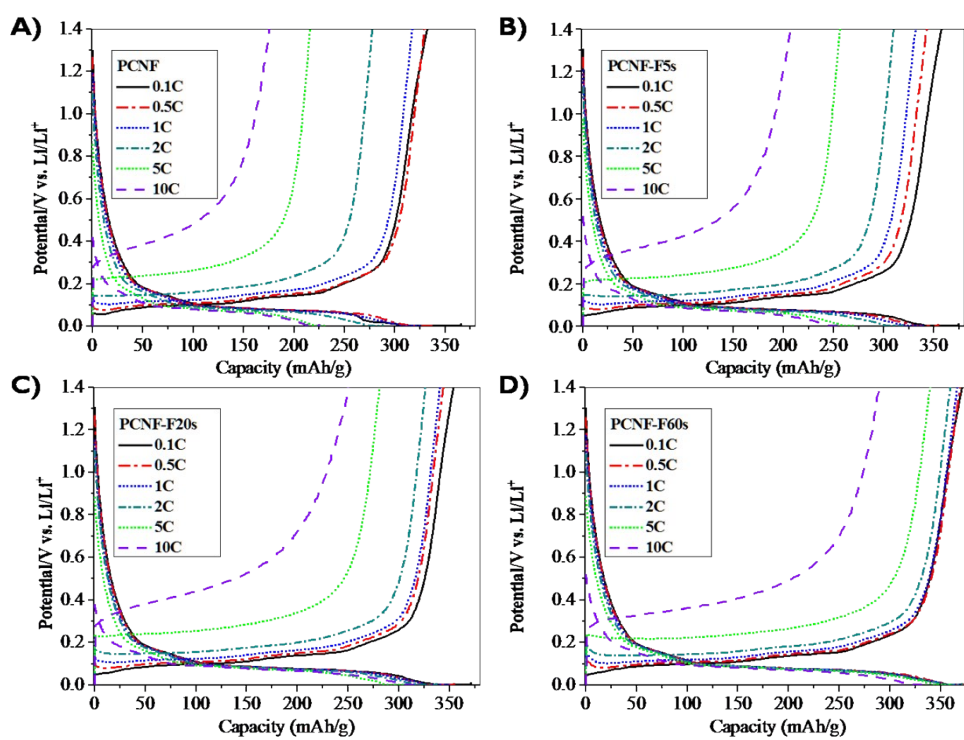

**Fig. S3** Charge/discharge profiles of PCNF and  $C_mF_n$ -modified PCNFs at various current rates ranging from 0.1C to 10C (1C = 372 mAh/g)



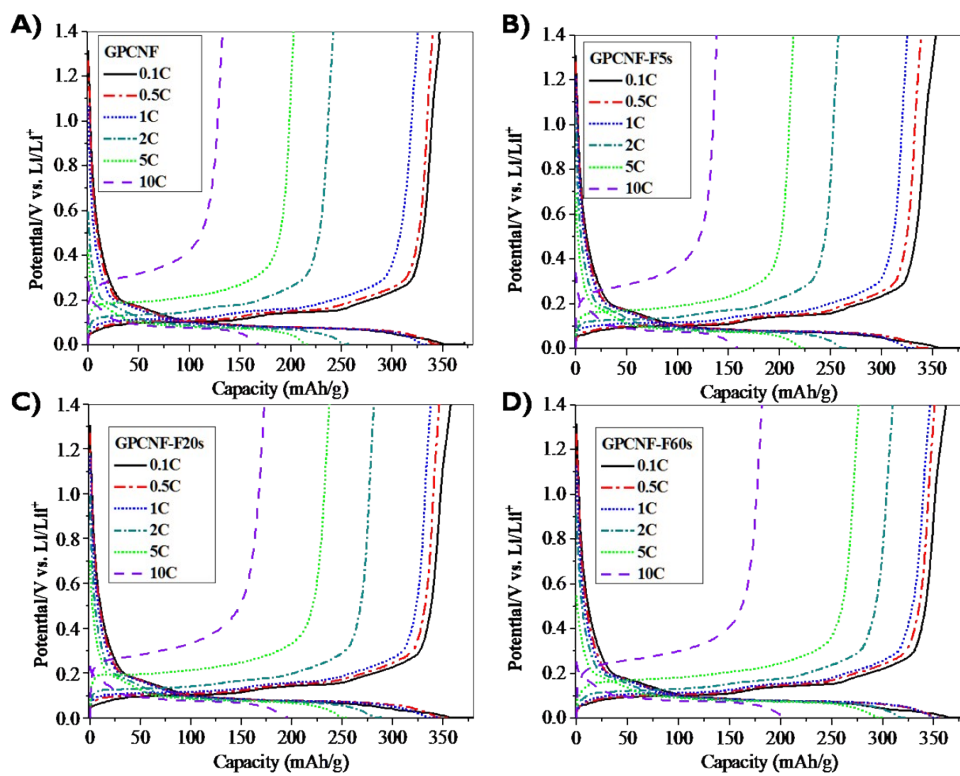

**Fig. S4** Charge/discharge profiles of GPCNF and  $C_mF_n$ -modified GPCNFs at various current rates ranging from 0.1C to 10C (1C = 372 mAh/g)

**Table S5** Coulombic efficiency of the pristine PCNF/GPCNF and C<sub>m</sub>F<sub>n</sub>-modified PCNFs/GPCNFs per C-rate after 5 cycles.

| Sample            | Coulombic efficiency per C-rate after 5 cycles (%) |      |      |      |      |      |
|-------------------|----------------------------------------------------|------|------|------|------|------|
|                   | 0.1C                                               | 0.5C | 1C   | 2C   | 5C   | 10C  |
| <b>PCNF</b>       | 94.1                                               | 97.7 | 97.9 | 97.2 | 93.5 | 81.0 |
| <b>PCNF-F5s</b>   | 96.7                                               | 96.8 | 98.2 | 98.0 | 94.3 | 82.4 |
| <b>PCNF-F20s</b>  | 96.6                                               | 97.8 | 98.0 | 97.8 | 93.9 | 84.3 |
| <b>PCNF-F60s</b>  | 96.5                                               | 97.5 | 97.9 | 97.5 | 94.8 | 88.2 |
| <b>GPCNF</b>      | 94.3                                               | 98.3 | 97.3 | 94.8 | 93.5 | 82.1 |
| <b>GPCNF-F5s</b>  | 94.2                                               | 98.4 | 98.5 | 97.6 | 95.7 | 84.0 |
| <b>GPCNF-F20s</b> | 95.2                                               | 98.2 | 98.6 | 98.1 | 94.4 | 83.8 |
| <b>GPCNF-F60s</b> | 95.2                                               | 98.2 | 98.0 | 96.4 | 92.9 | 86.2 |

**Table S6**  $R_{ct}$  value of pristine PCNF/GPCNF and  $C_mF_n$ -modified PCNFs/GPCNFs

|                   | Resistance                       |                                         |
|-------------------|----------------------------------|-----------------------------------------|
|                   | Passivation<br>( $R_f, \Omega$ ) | Charge transfer<br>( $R_{ct}, \Omega$ ) |
| <b>PCNF</b>       | 12.4                             | 12.3                                    |
| <b>PCNF-F5s</b>   | 5.2                              | 10.7                                    |
| <b>PCNF-F20s</b>  | 4.8                              | 8.4                                     |
| <b>PCNF-F60s</b>  | 3.9                              | 6.7                                     |
| <b>GPCNF</b>      | 6.9                              | 9.0                                     |
| <b>GPCNF-F5s</b>  | 5.7                              | 5.8                                     |
| <b>GPCNF-F20s</b> | 4.6                              | 5.6                                     |
| <b>GPCNF-F60s</b> | 3.4                              | 4.5                                     |
